# Supplementary material for: Development of a Univariate Membrane-Based Mid-Infrared Method for Protein Quantitation and Total Lipid Content Analysis of Biological Samples
Source: Hindawi journal article supplement (doi:10.1155/2014/657079), 2014-01-01

A

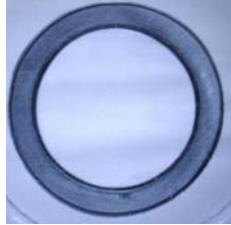

B

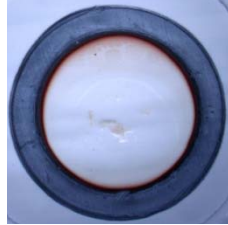

C

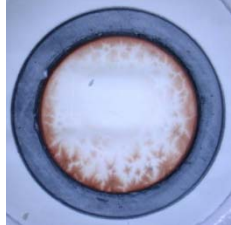

D

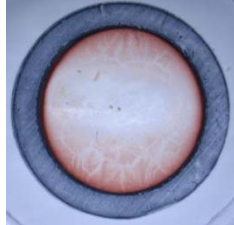

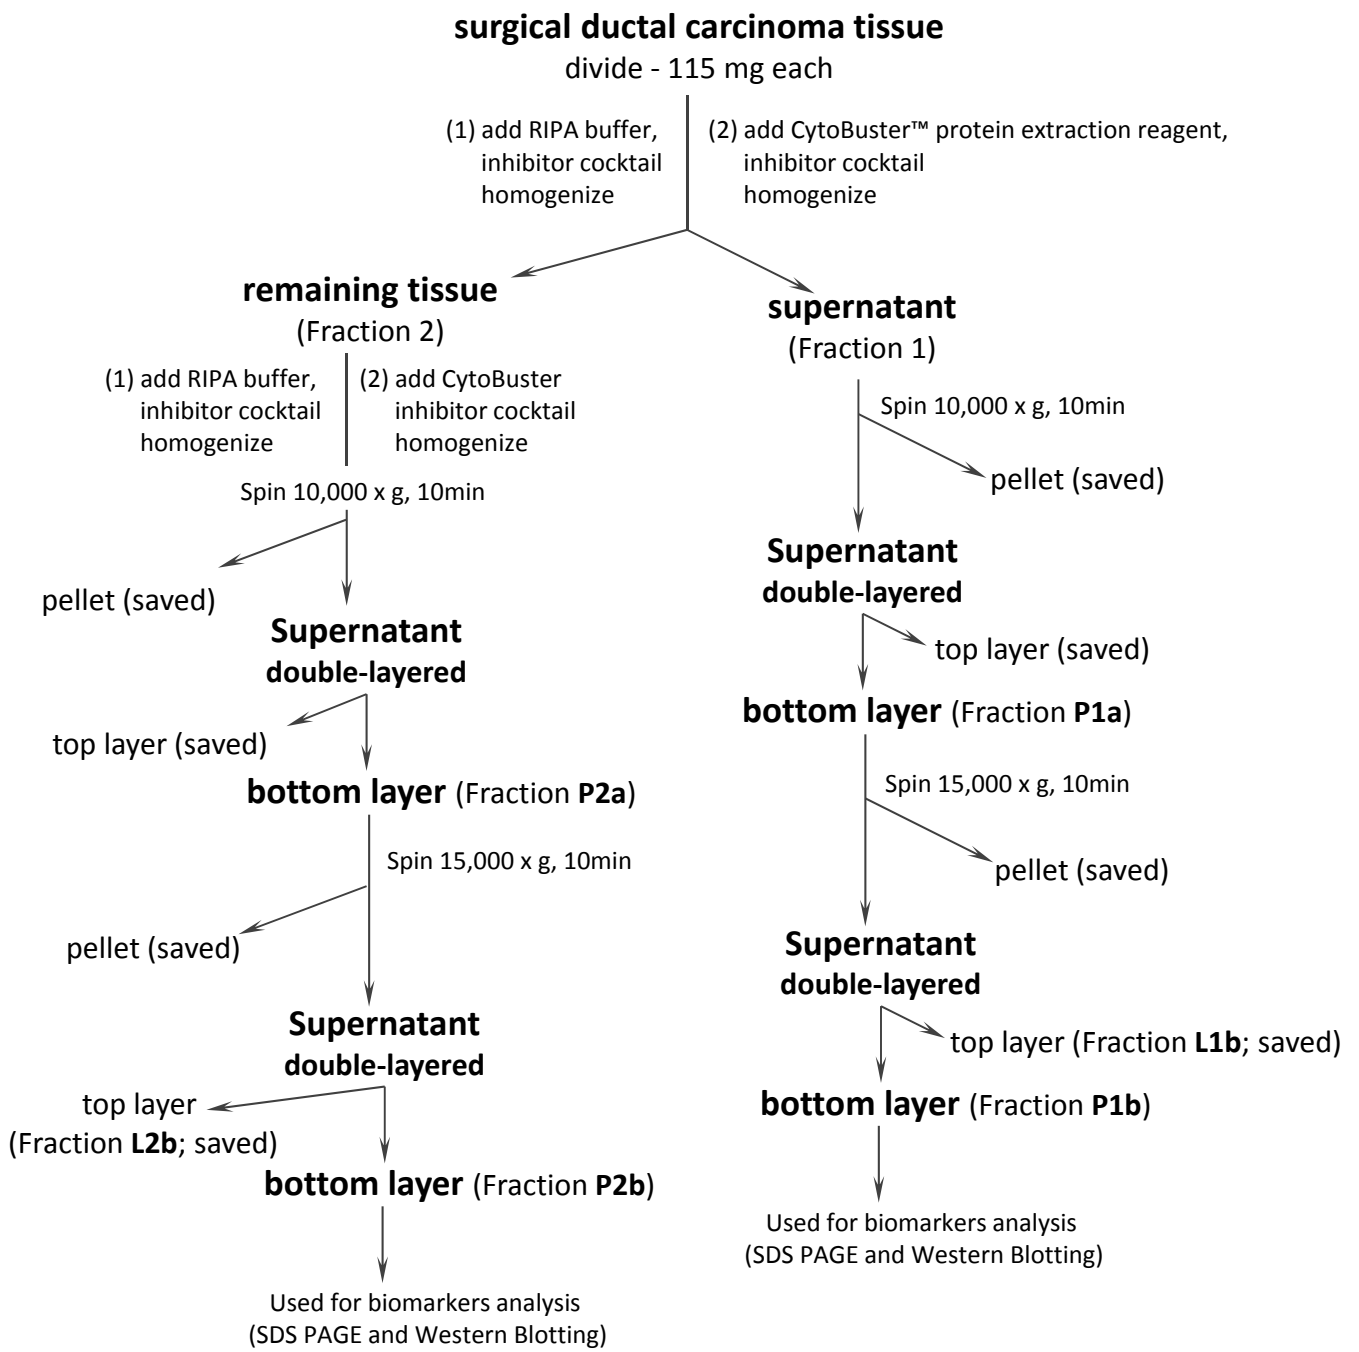

Supplementary Figure S2

**A**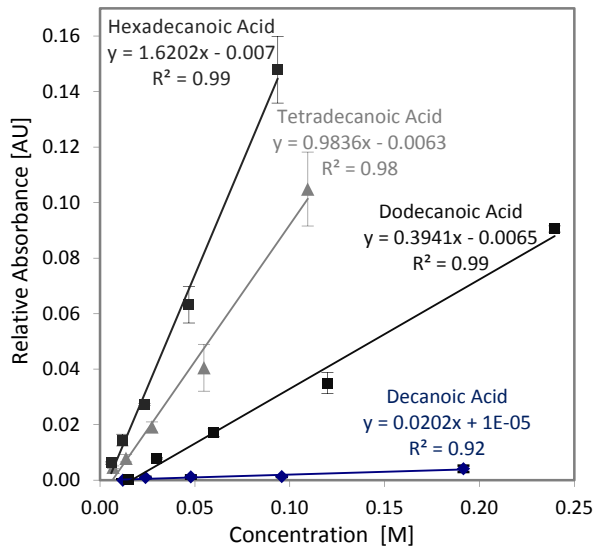**B**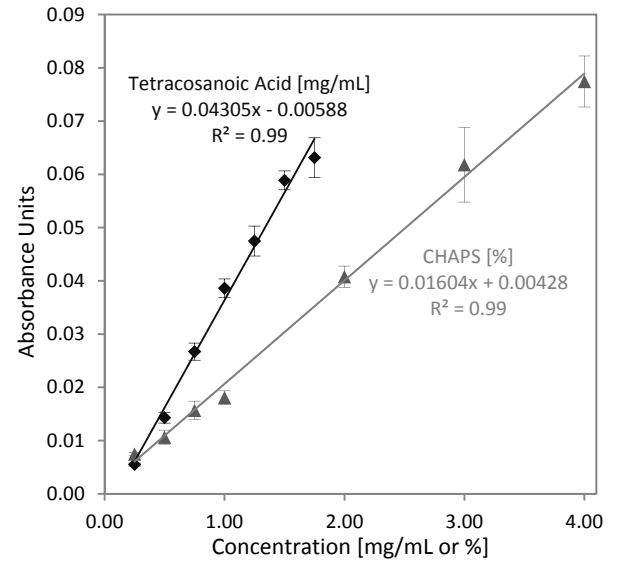

Supplement: f1 [file 657079.f1.pdf]
